# Supplementary material for: Co-Infection Patterns in Individual Ixodes scapularis Ticks Reveal Associations between Viral, Eukaryotic and Bacterial Microorganisms
Source: MDPI journal article supplement (doi:10.3390/v10070388), 2018-07-22
Supplement: s1 [file s1]

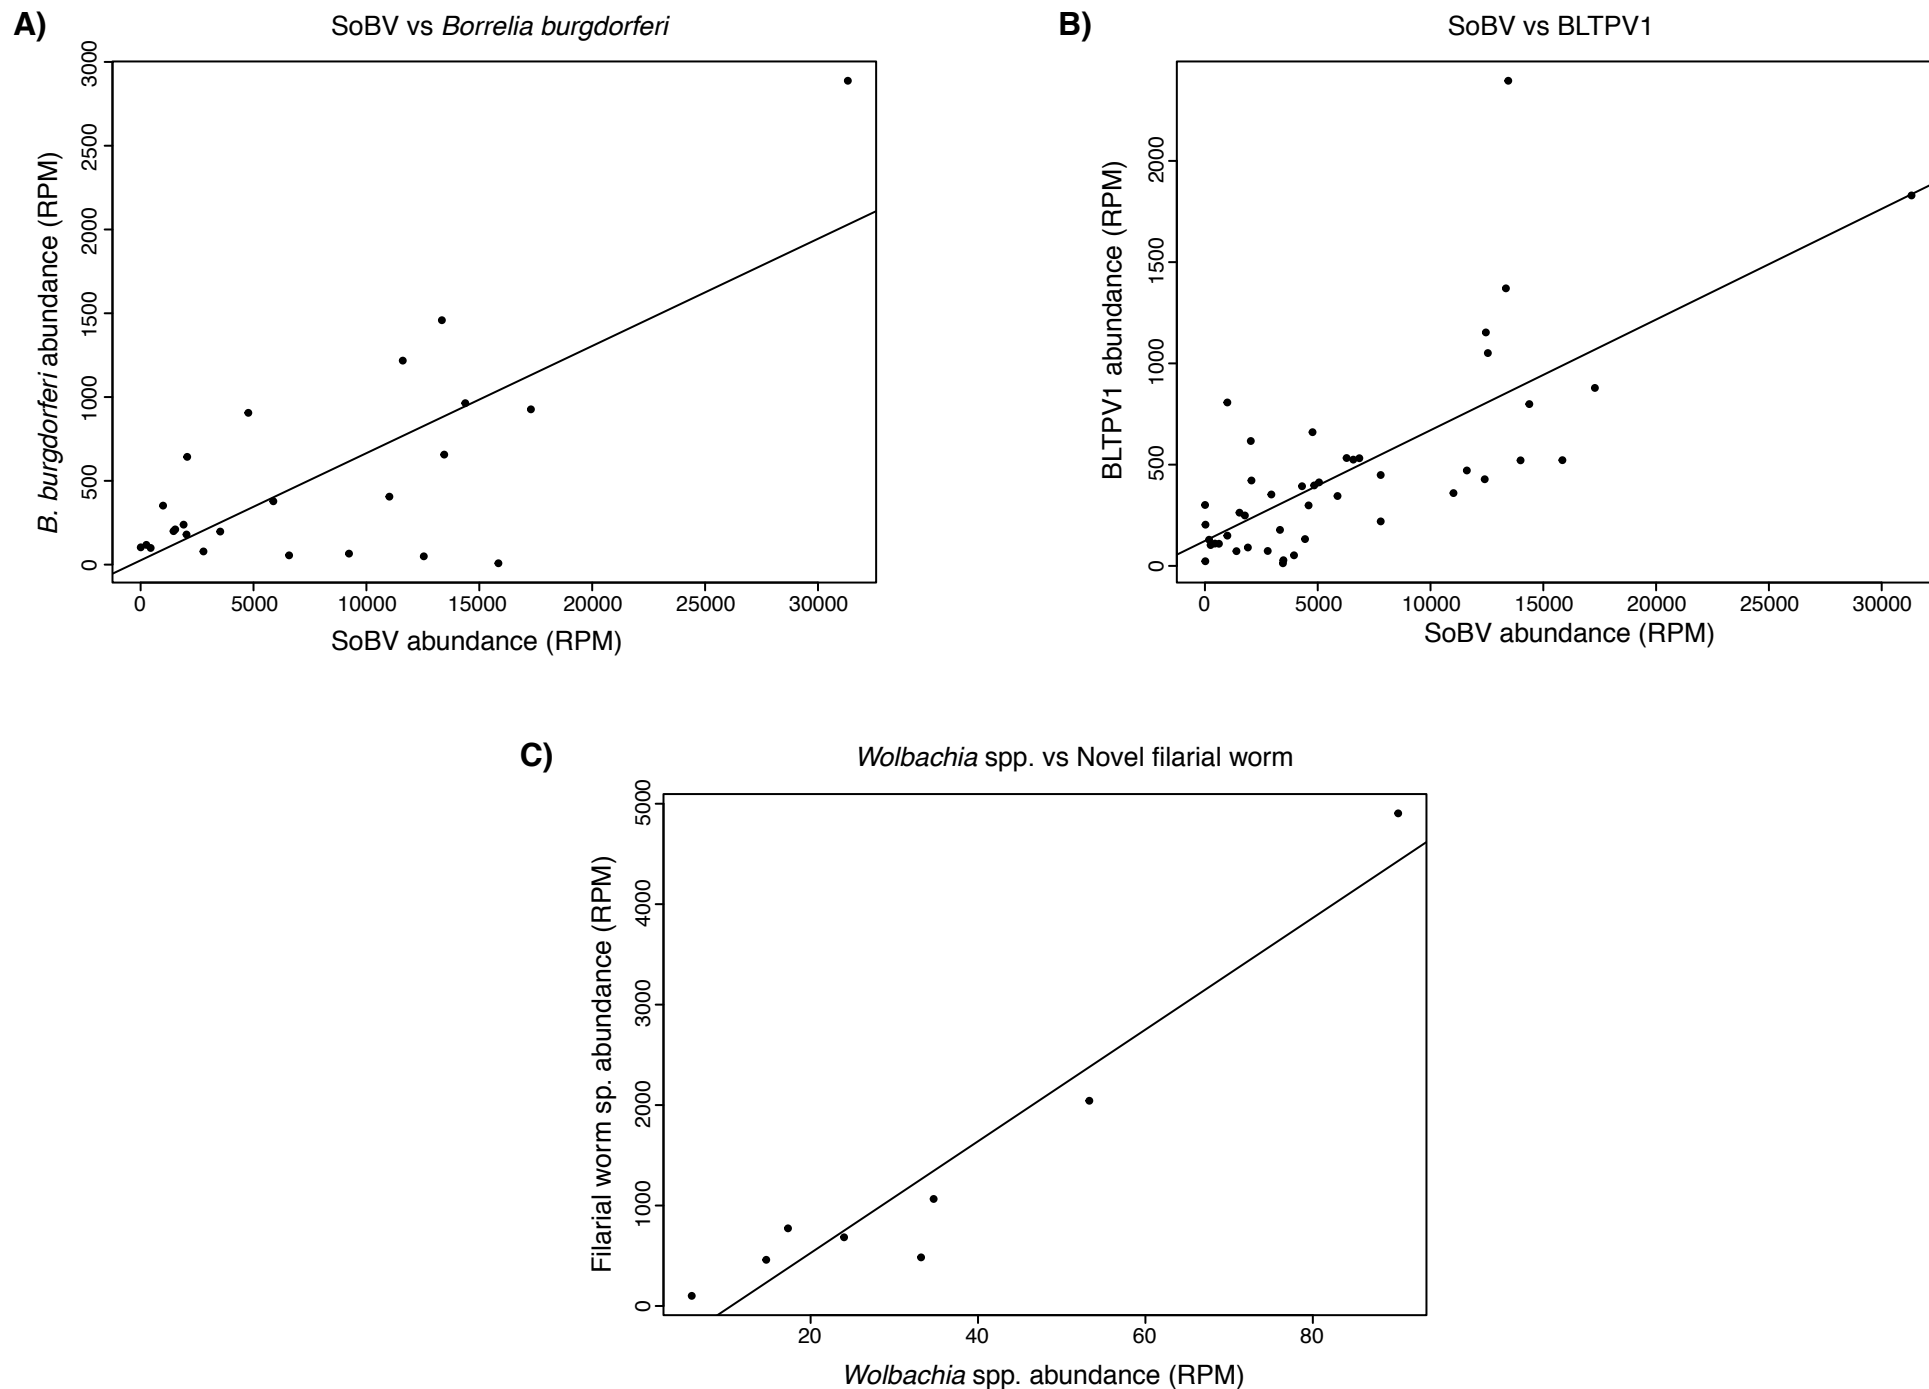

**Supplemental Figure 1. Positive correlations are seen within multiple microbial pairs by abundance.** Scatterplot of RNA levels (mapping reads per million unique reads; RPM) for (a) South Bay virus (SoBV) and *Borrelia burgdorferi*, (b) SoBV and blacklegged tick phlebovirus 1 (BLTPV1), and (c) *Wolbachia* spp. and the novel filarial worm specie. Linear regression lines are also plotted.
